# Supplementary material for: Nanostructured liquid-crystalline ion conductors based on linear carbonate moieties: effects of oligooxyethylene and alkylene spacers on self-assembled properties and ionic conductivities
Source: Royal Society of Chemistry journal article supplement (doi:10.1039/d4me00176a), 2025-01-01
Supplement: d4me00176a1.pdf [file d4me00176a1.pdf]

## Supporting Information

### **Nanostructured liquid-crystalline ion conductors based on linear carbonate moieties: effects of oligooxyethylene and alkylene spacers on self-assembled properties and ionic conductivities**

Junya Uchida,<sup>a</sup> Shingo Takegawa,<sup>a</sup> Soshi Ito,<sup>a</sup> Shunsuke Sato,<sup>b</sup> Go Watanabe<sup>b,c,d</sup> and Takashi Kato<sup>\*a,e</sup>

<sup>a</sup> *Department of Chemistry and Biotechnology, School of Engineering, The University of Tokyo, Hongo, Bunkyo-ku, Tokyo 113-8656, Japan. E-mail: kato@chiral.t.u-tokyo.ac.jp*

<sup>b</sup> *Department of Physics, School of Science, Kitasato University, Sagamihara, Kanagawa 252-0373, Japan*

<sup>c</sup> *Department of Data Science, School of Frontier Engineering, Kitasato University, Sagamihara, Kanagawa 252-0373, Japan*

<sup>d</sup> *Kanagawa Institute of Industrial Science and Technology (KISTEC), Ebina, Kanagawa 242-0435, Japan*

<sup>e</sup> *Institute for Aqua Regeneration, Shinshu University, Wakasato, Nagano 380-8553, Japan*

**Table of contents:**

|                                                      |            |
|------------------------------------------------------|------------|
| <b>1. Liquid-crystalline (LC) properties</b>         | <b>S3</b>  |
| <b>2. Fourier transform infrared (FT-IR) spectra</b> | <b>S18</b> |
| <b>3. Ionic conductivities</b>                       | <b>S19</b> |
| <b>4. Molecular dynamics (MD) simulations</b>        | <b>S21</b> |

## 1. Liquid-crystalline (LC) properties

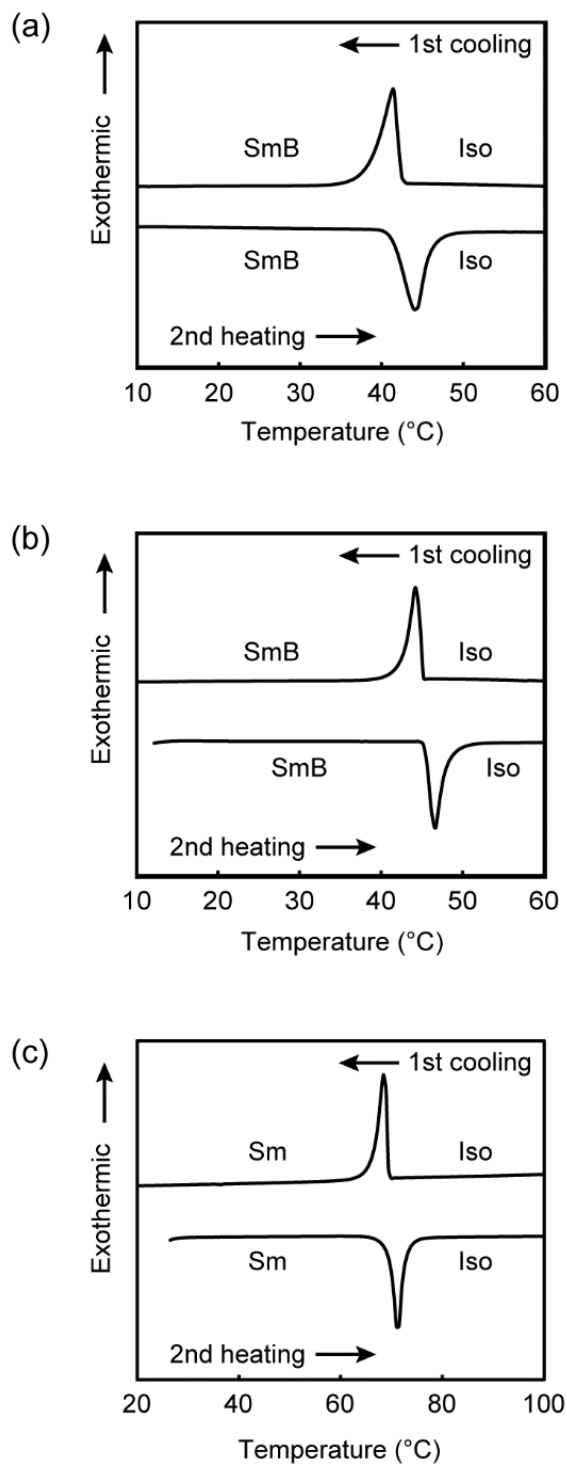

**Fig. S1** Differential scanning calorimetry (DSC) thermograms of (a) compound **1**, (b) compound **2**, and (c) compound **3**.

(a)

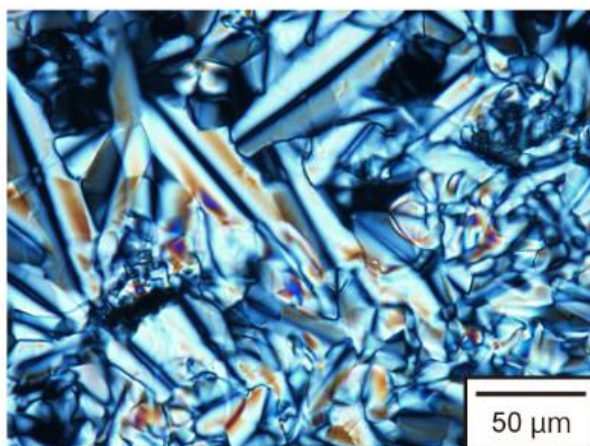

(b)

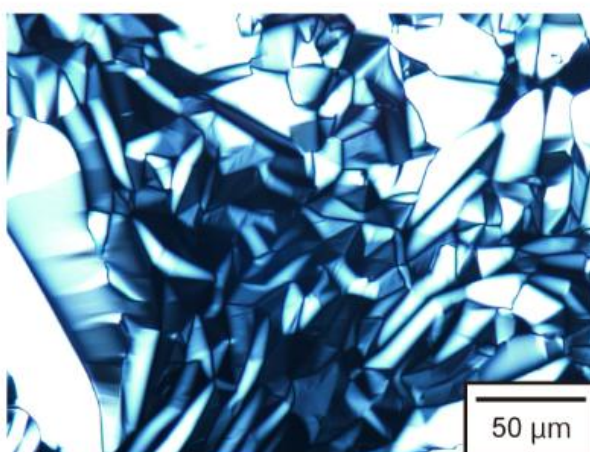

**Fig. S2** Polarizing optical micrographs of (a) compound **1** and (b) compound **2** at 30 °C.

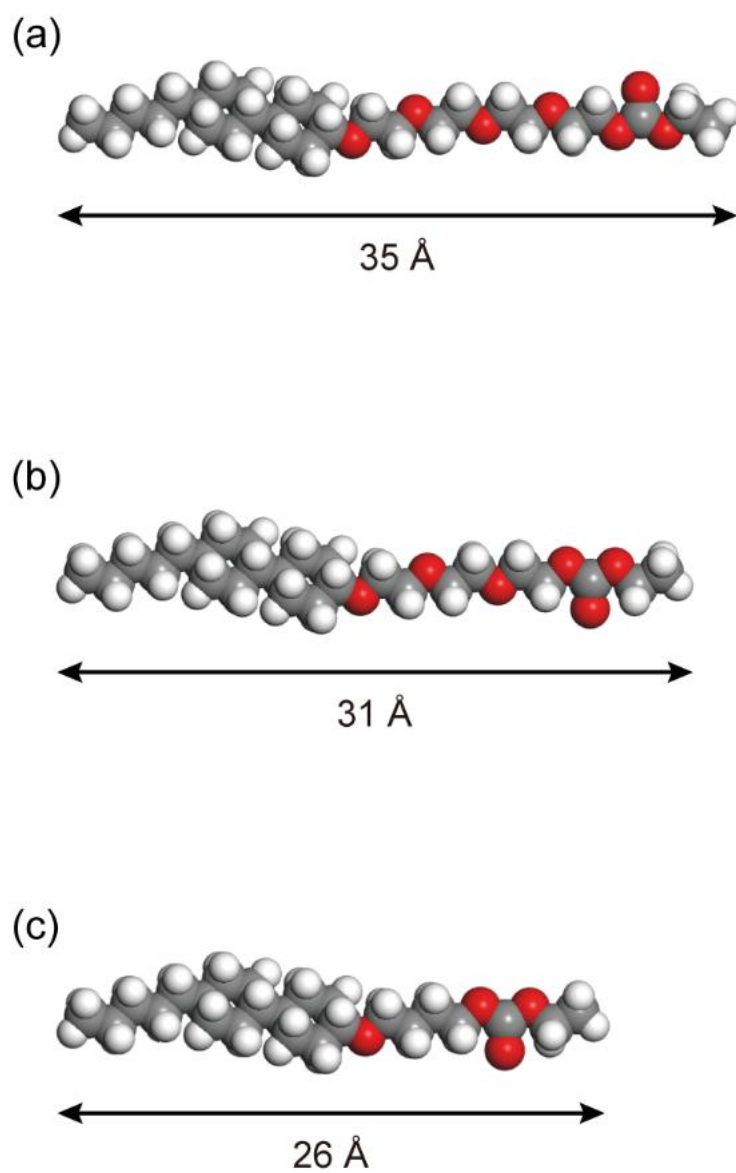

**Fig. S3** Molecular models of (a) compound **1**, (b) compound **2**, and (c) compound **3** in the extended forms.

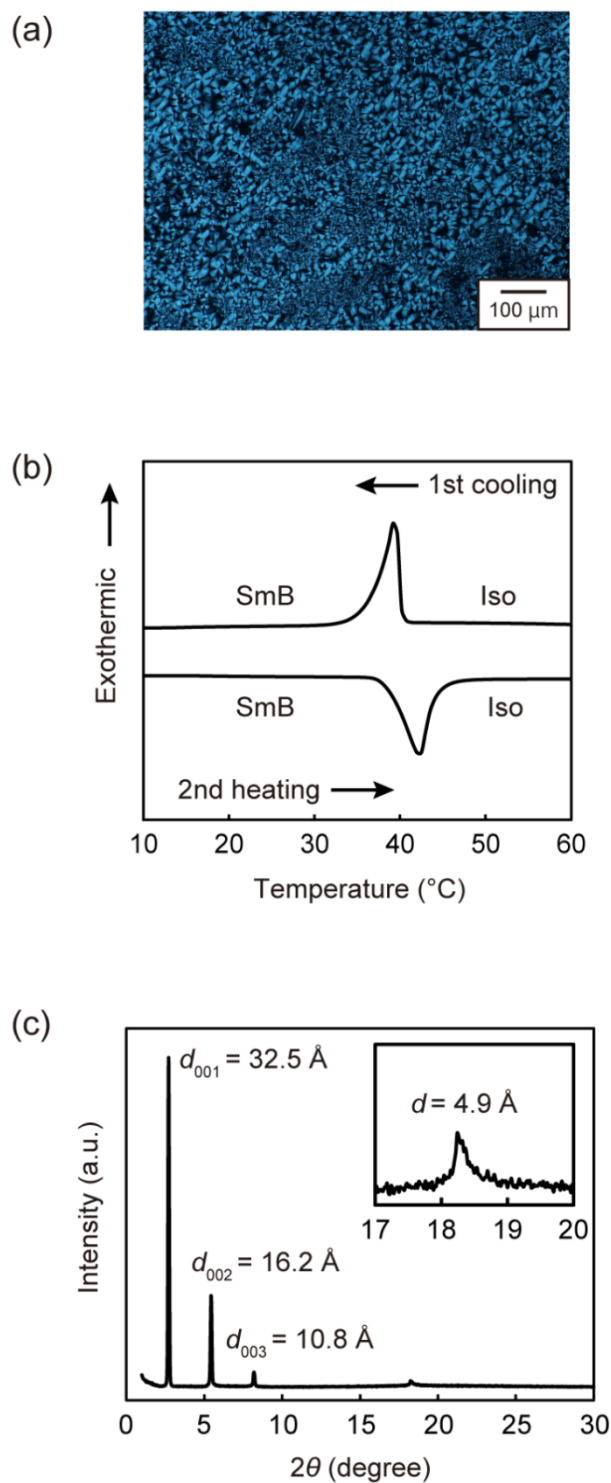

**Fig. S4** LC properties of **1**/lithium bis(trifluoromethylsulfonyl)imide (LiTFSI) (9:1). (a) Polarizing optical micrograph at 30 °C. (b) DSC thermograms. (c) X-ray diffraction (XRD) pattern at 30 °C.

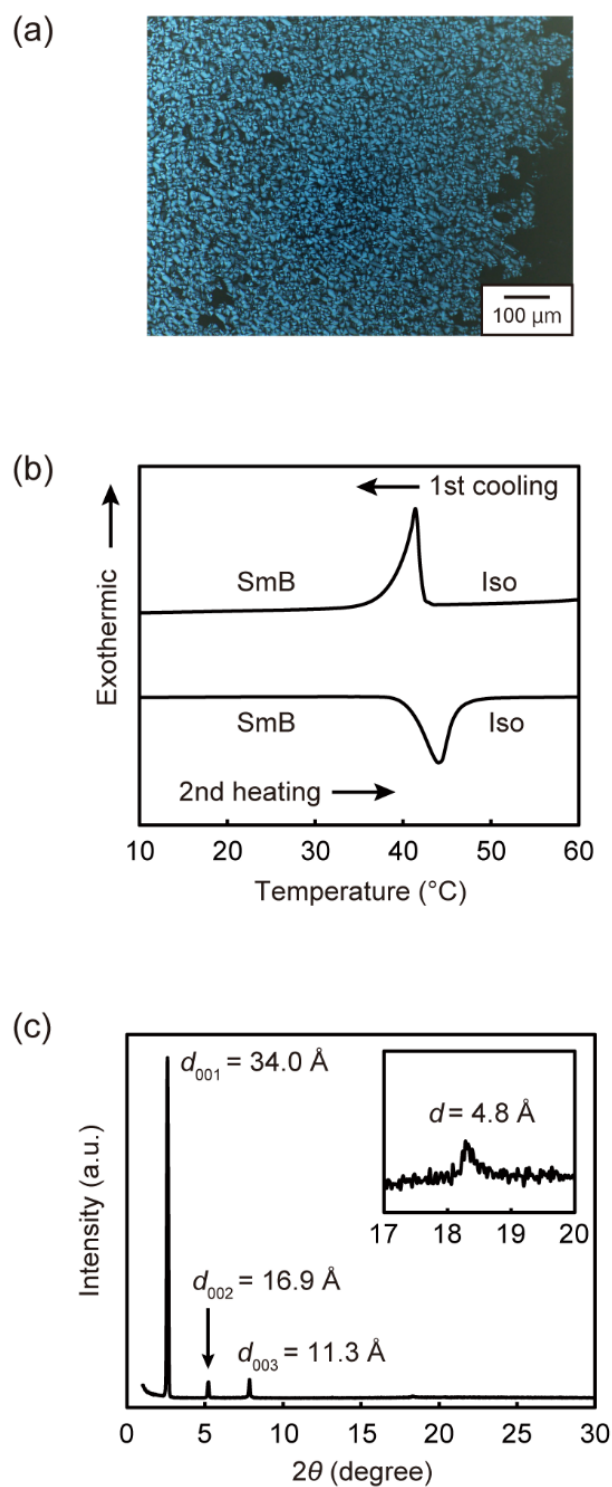

**Fig. S5** LC properties of 1/LiTFSI (8:2). (a) Polarizing optical micrograph at 30 °C. (b) DSC thermograms. (c) XRD pattern at 30 °C.

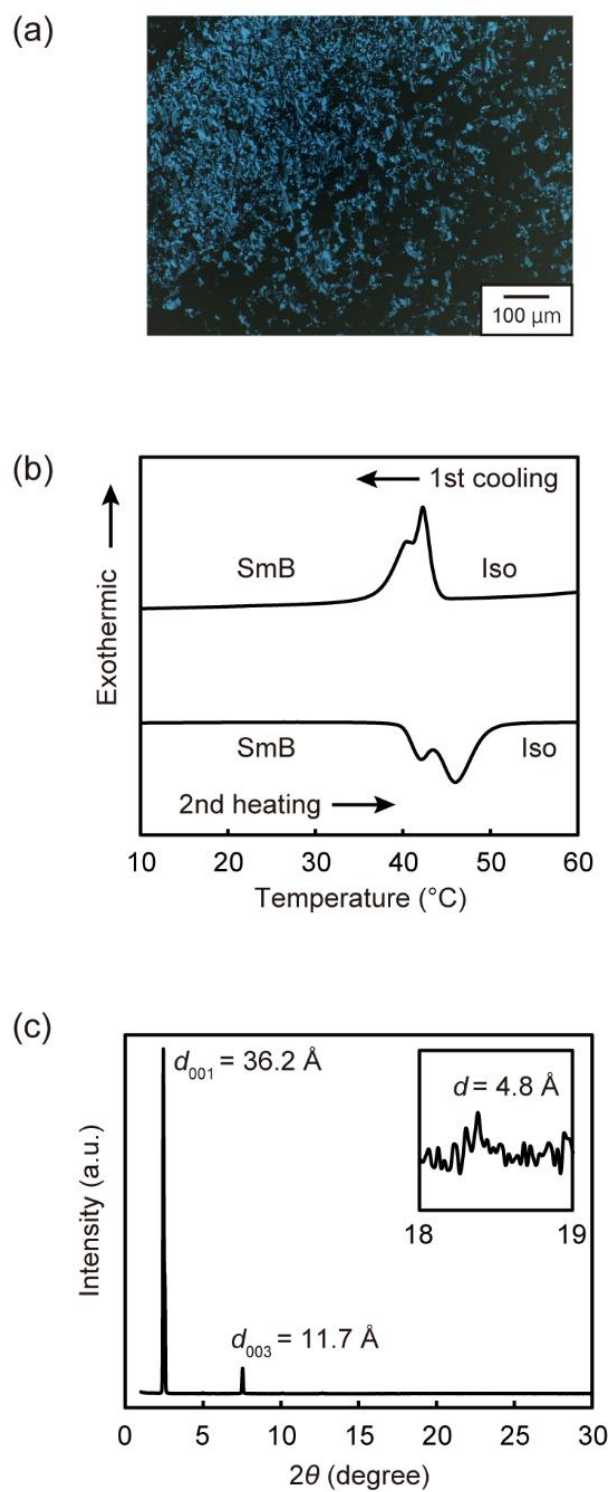

**Fig. S6** LC properties of 1/LiTFSI (7:3). (a) Polarizing optical micrograph at 30 °C. (b) DSC thermograms. (c) XRD pattern at 25 °C.



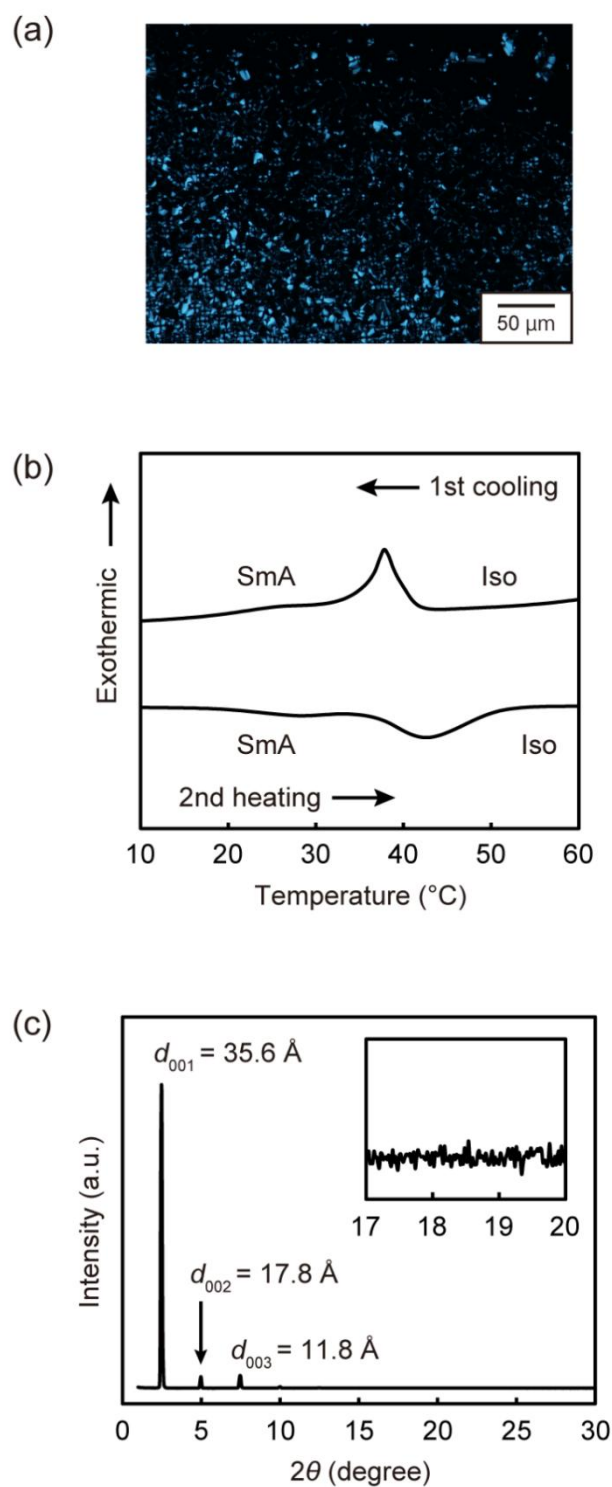

**Fig. S7** LC properties of 1/LiTFSI (6:4). (a) Polarizing optical micrograph at 25 °C. (b) DSC thermograms. (c) XRD pattern at 30 °C.

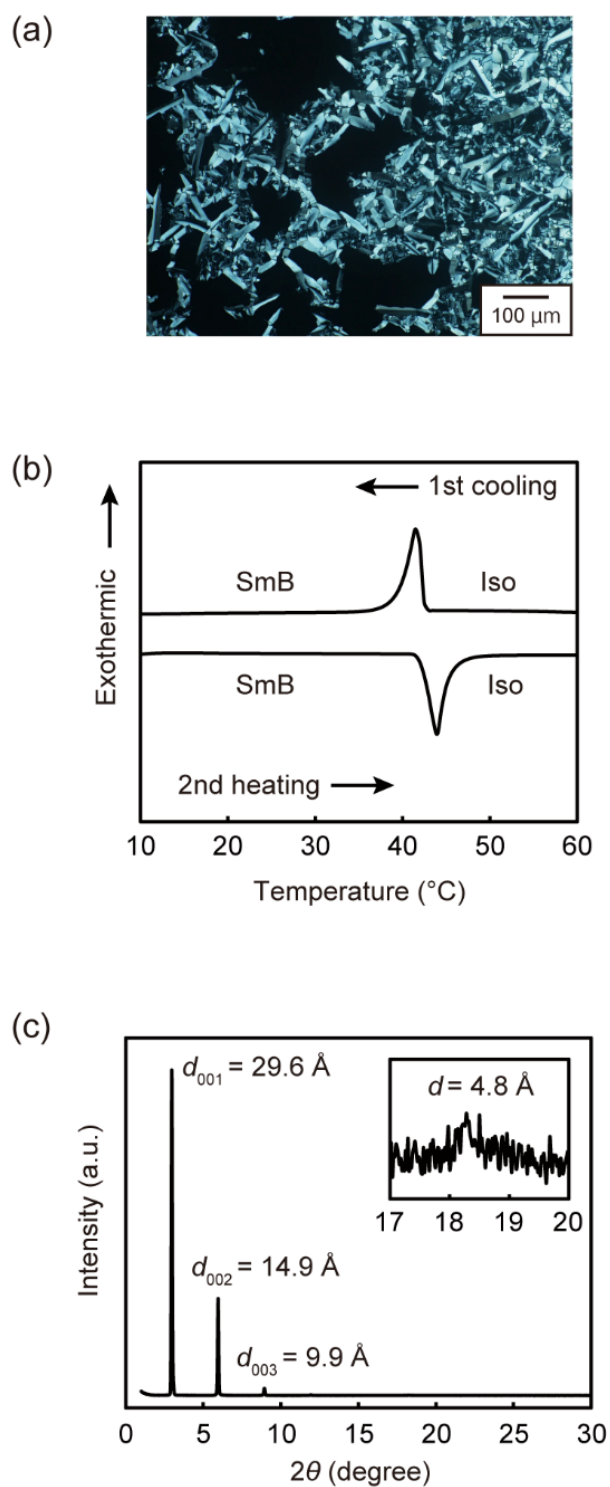

**Fig. S8** LC properties of **2**/LiTFSI (9:1). (a) Polarizing optical micrograph at 30 °C. (b) DSC thermograms. (c) XRD pattern at 30 °C.

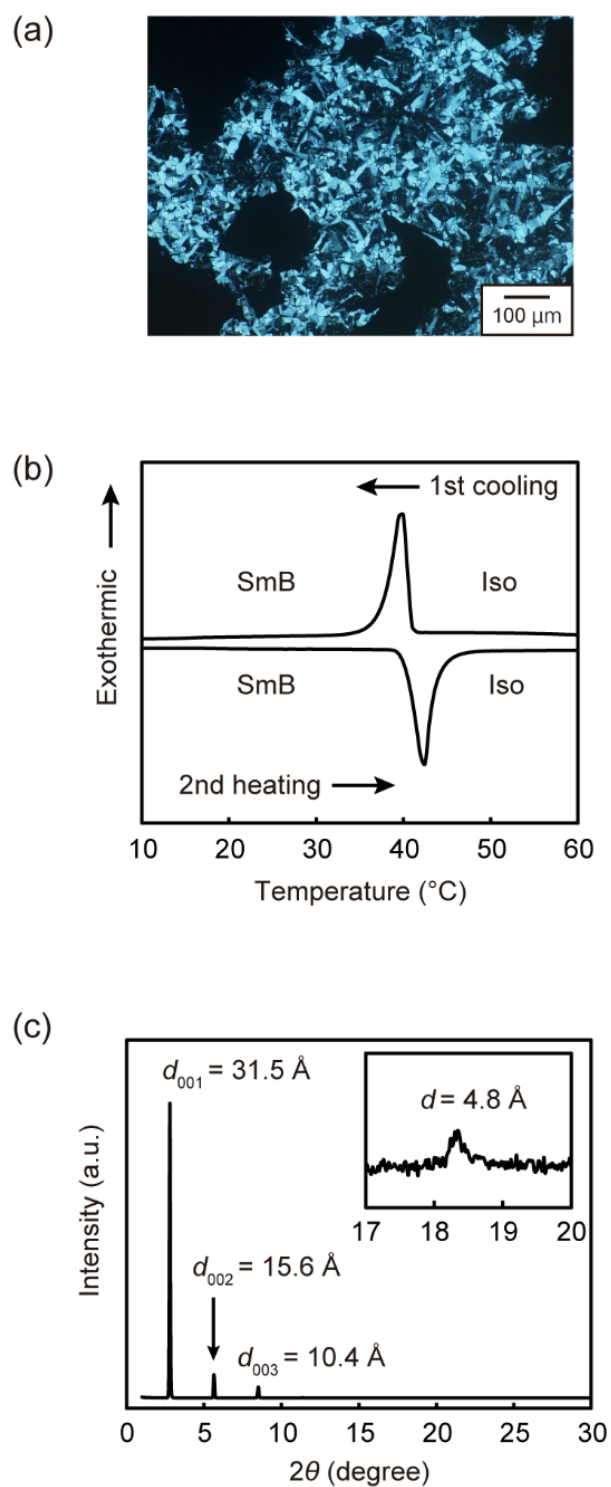

**Fig. S9** LC properties of **2**/LiTFSI (8:2). (a) Polarizing optical micrograph at 30 °C. (b) DSC thermograms. (c) XRD pattern at 30 °C.

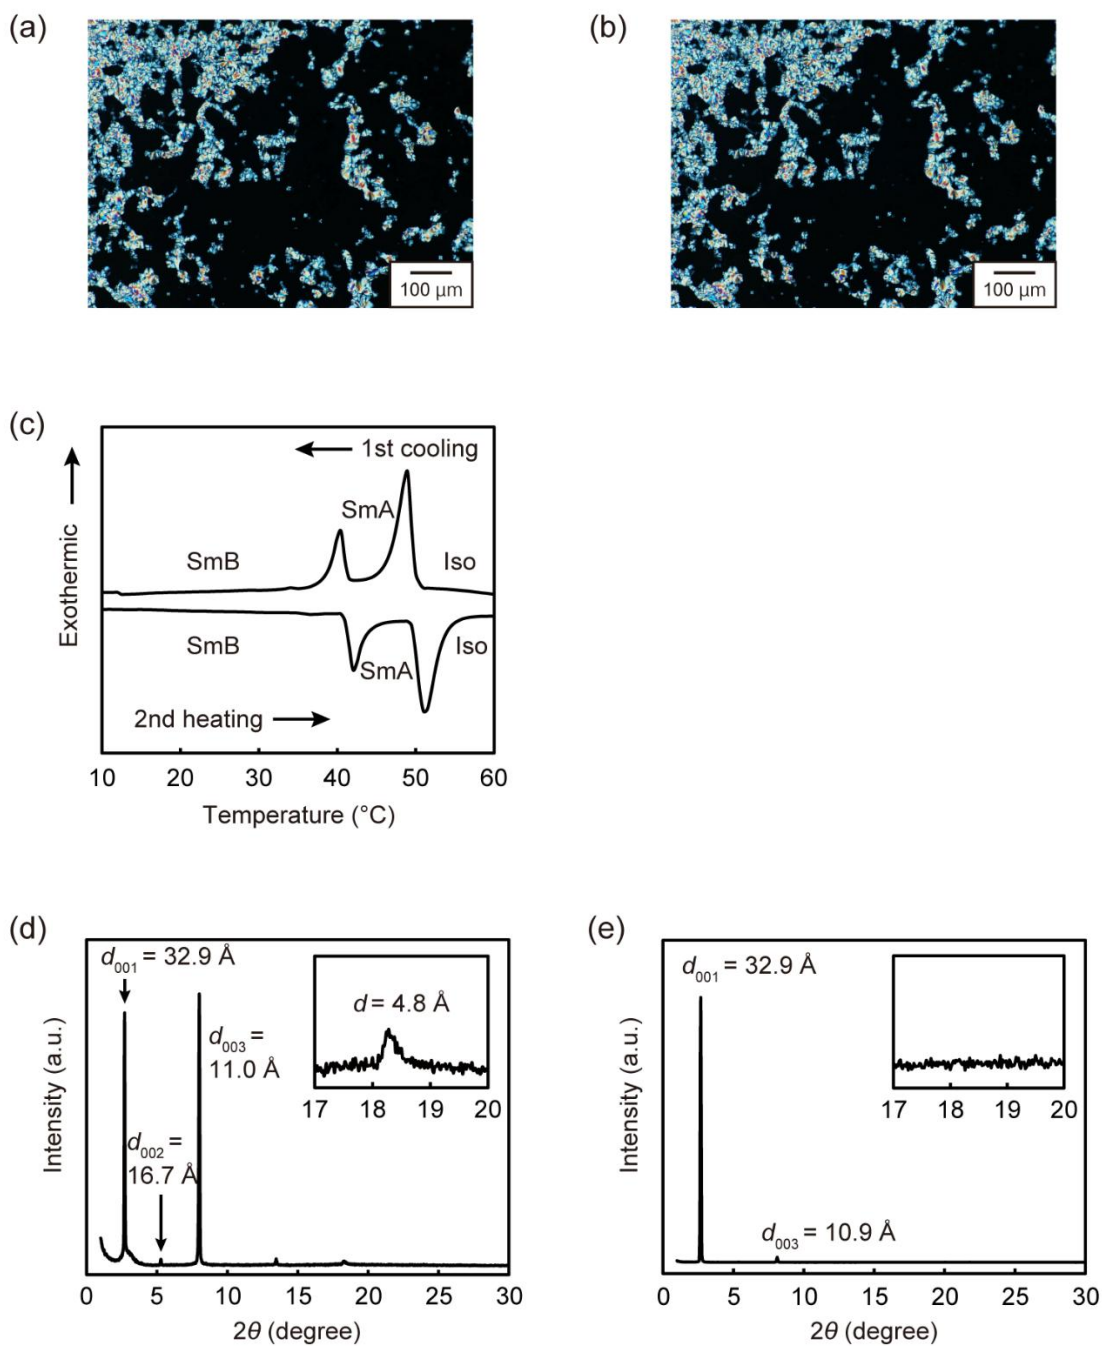

**Fig. S10** LC properties of **2**/LiTFSI (7:3). (a,b) Polarizing optical micrographs at (a) 30 °C and (b) 41 °C. (c) DSC thermograms. (d,e) XRD patterns at (d) 30 °C and (e) 41 °C.

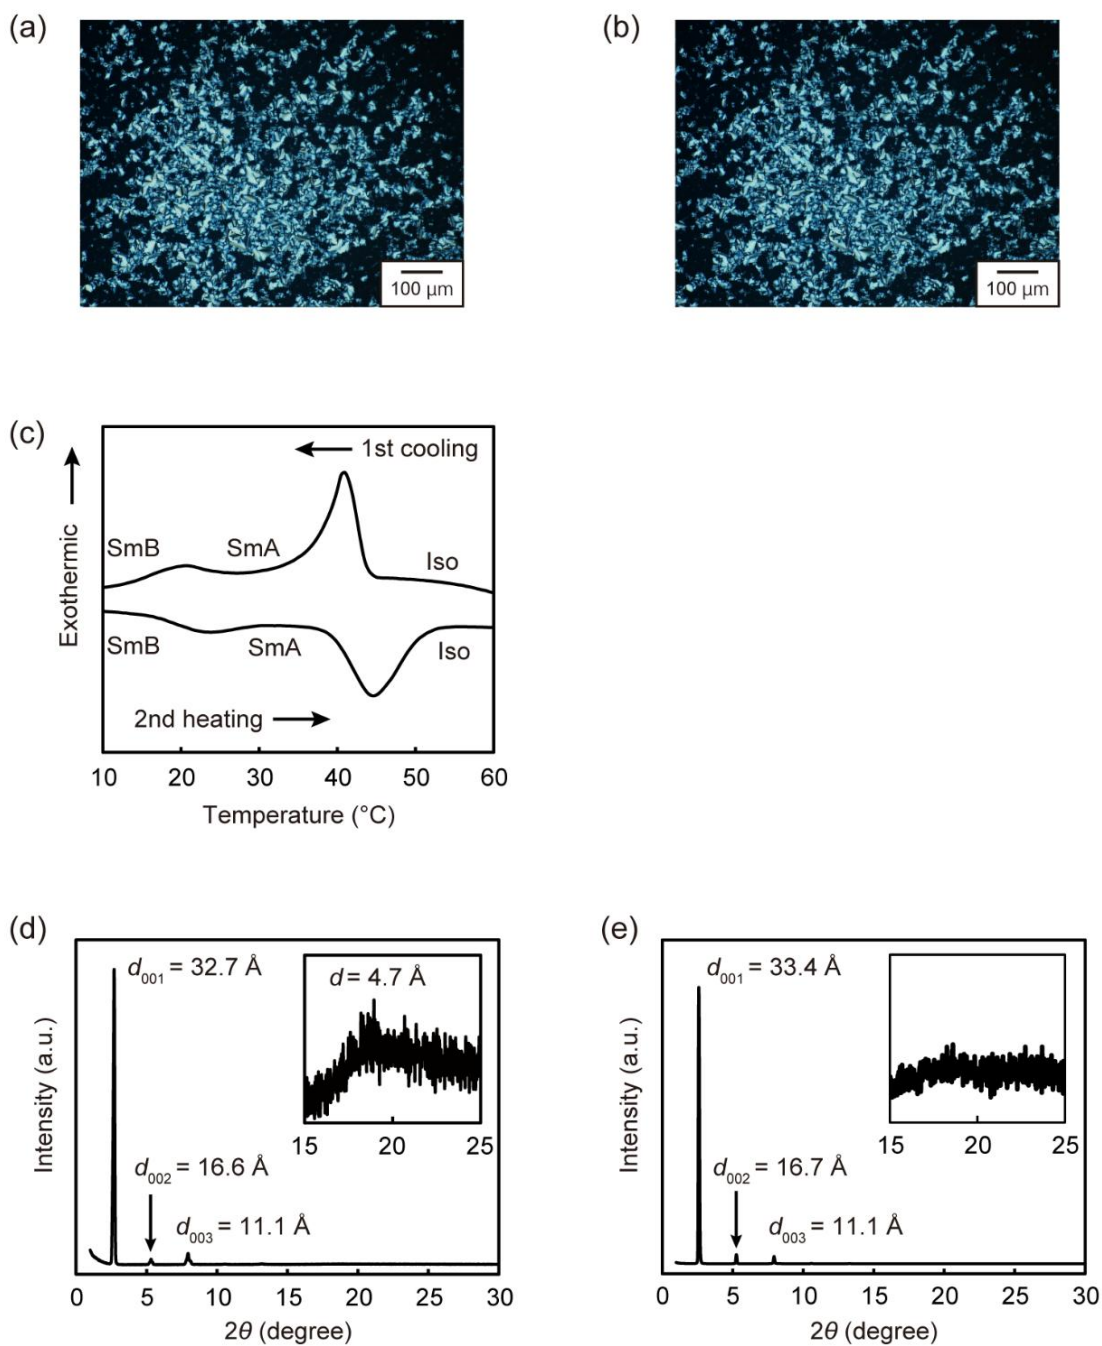

**Fig. S11** LC properties of **2**/LiTFSI (6:4). (a,b) Polarizing optical micrographs at (a) 14 °C and (b) 30 °C. (c) DSC thermograms. (d,e) XRD patterns at (d) 14 °C and (e) 30 °C.

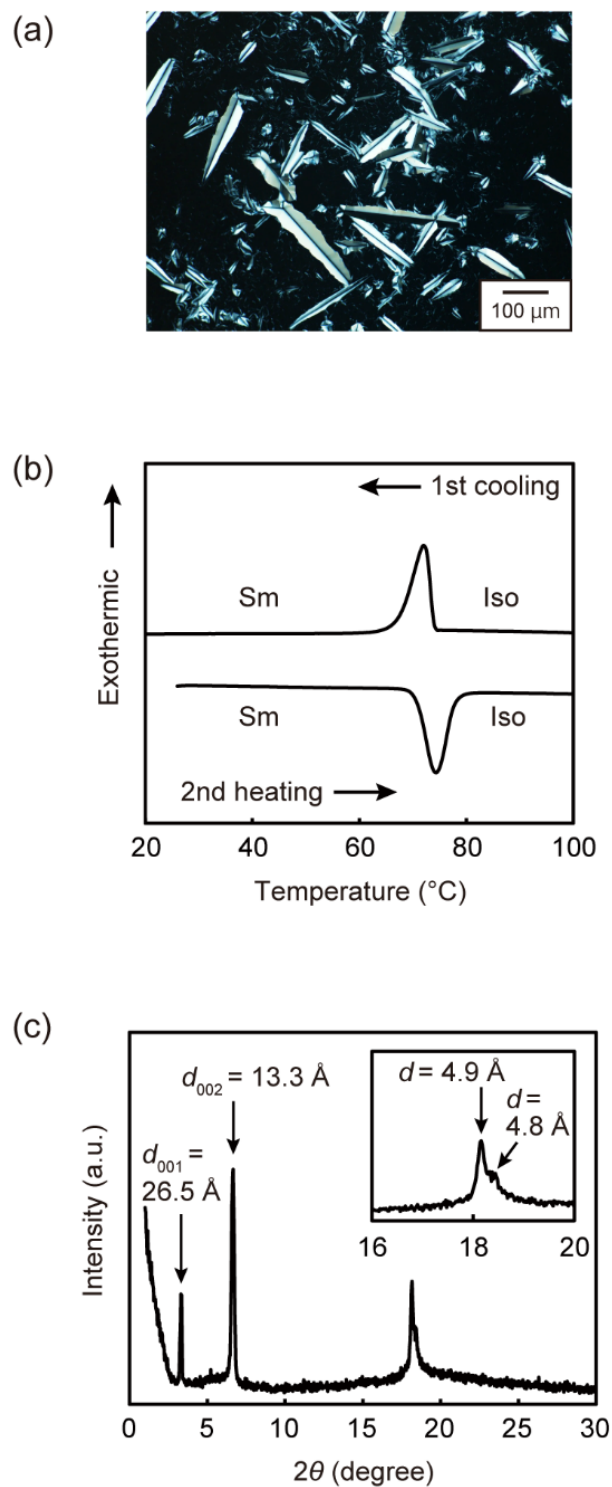

**Fig. S12** LC properties of **3**/LiTFSI (9:1). (a) Polarizing optical micrograph at 30 °C. (b) DSC thermograms. (c) XRD pattern at 30 °C.

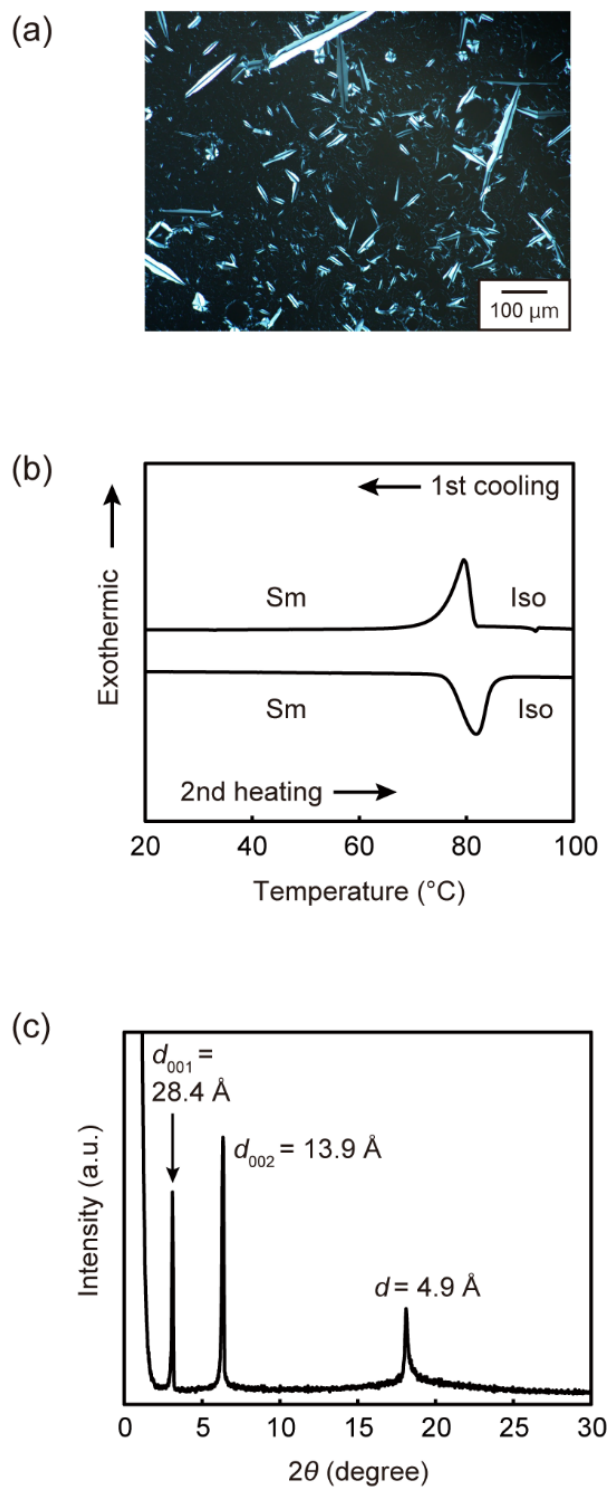

**Fig. S13** LC properties of **3**/LiTFSI (8:2). (a) Polarizing optical micrograph at 30 °C. (b) DSC thermograms. (c) XRD pattern at 30 °C.

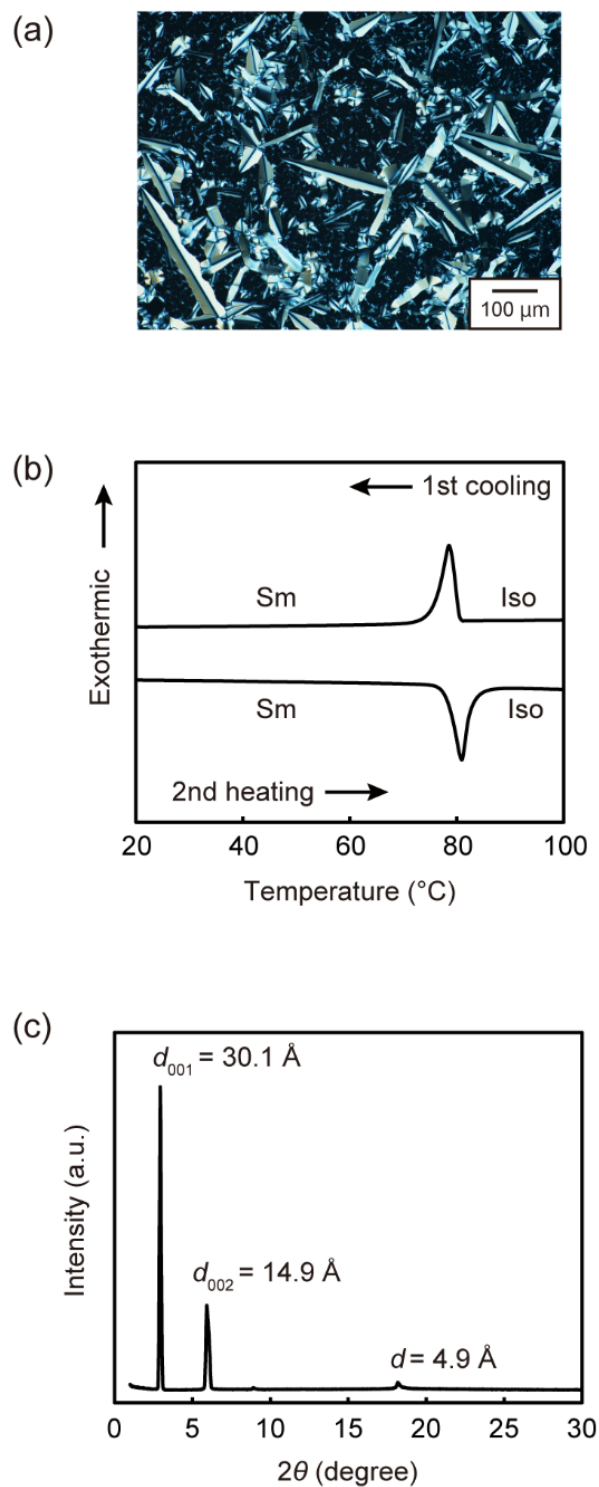

**Fig. S14** LC properties of **3**/LiTFSI (7:3). (a) Polarizing optical micrograph at 30 °C. (b) DSC thermograms. (c) XRD pattern at 30 °C.



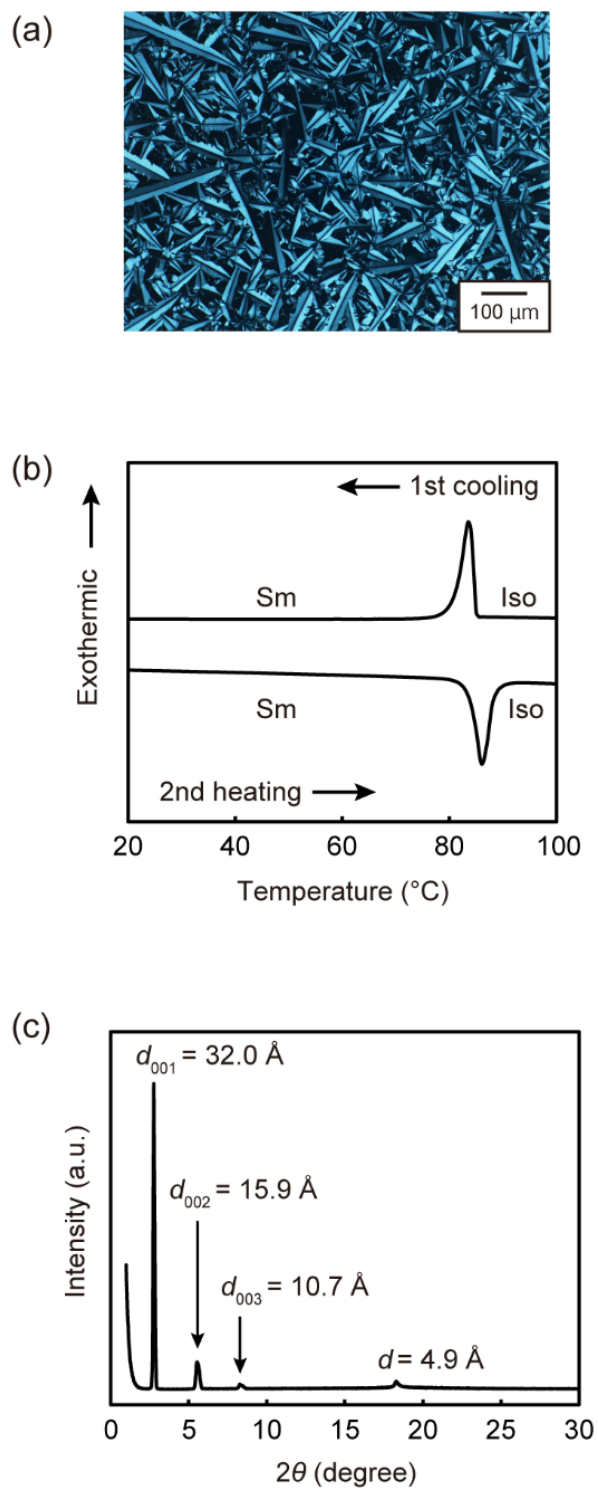

**Fig. S15** LC properties of **3**/LiTFSI (6:4). (a) Polarizing optical micrograph at 30 °C. (b) DSC thermograms. (c) XRD pattern at 30 °C.

## 2. Fourier transform infrared (FT-IR) spectra

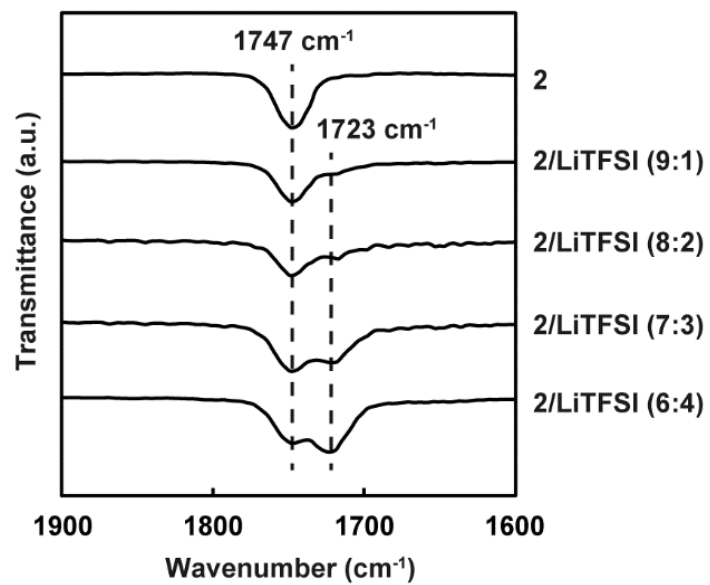

**Fig. S16** FT-IR spectra of 2/LiTFSI with different molar ratios of LiTFSI at 30 °C.

### 3. Ionic conductivities

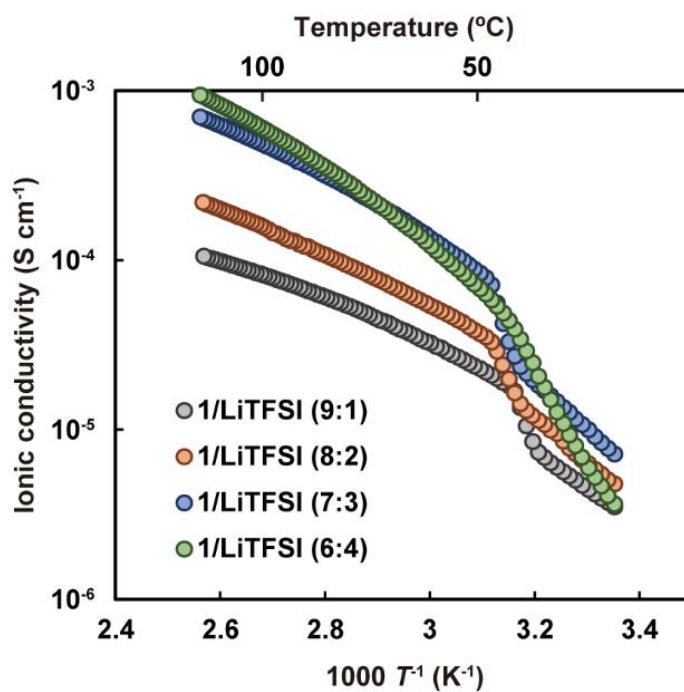

**Fig. S17** Ionic conductivities of 1/LiTFSI with different molar ratios of LiTFSI.

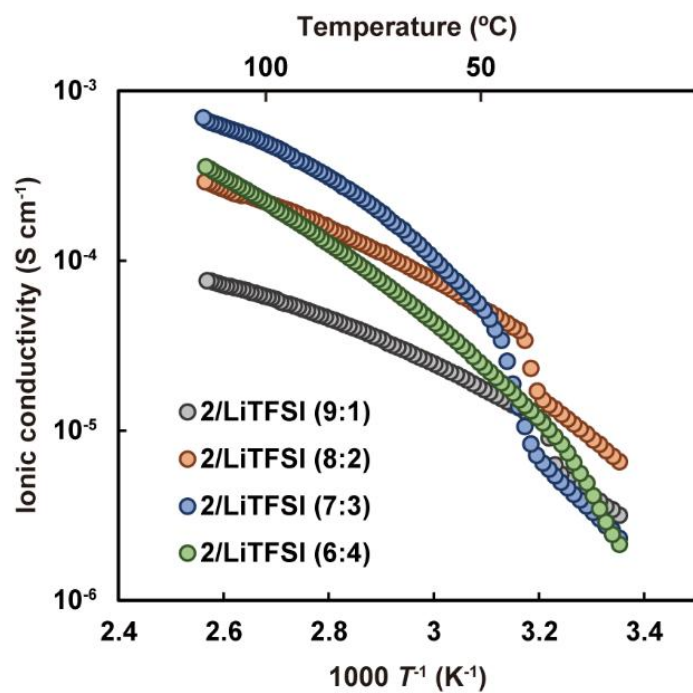

**Fig. S18** Ionic conductivities of 2/LiTFSI with different molar ratios of LiTFSI.

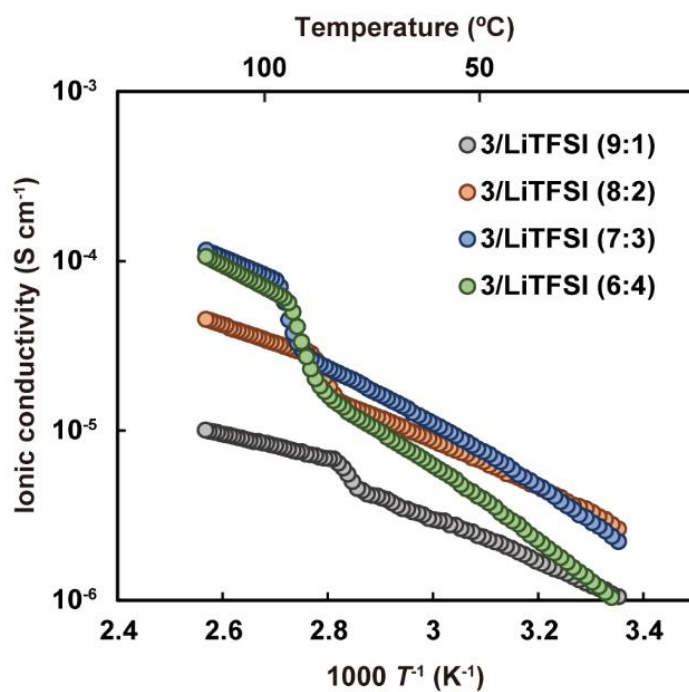

**Fig. S19** Ionic conductivities of 3/LiTFSI with different molar ratios of LiTFSI.

#### 4. Molecular dynamics (MD) simulations

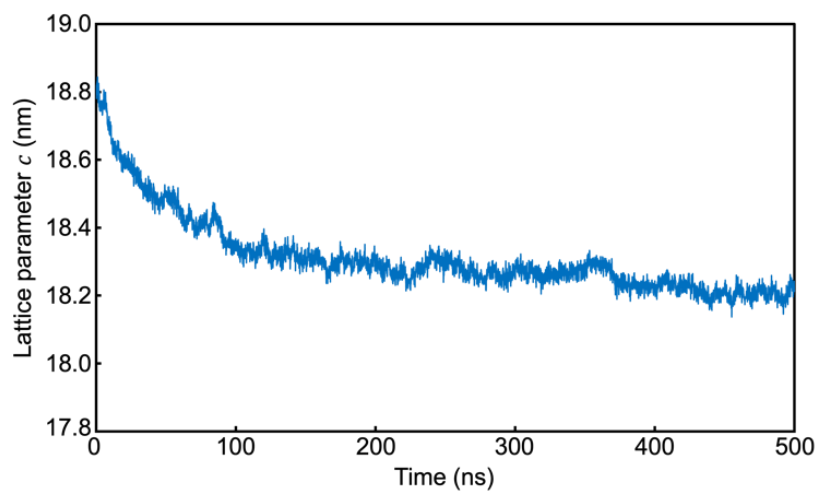

**Fig. S20** Time dependence of lattice parameter  $c$  of MD simulation box for compound **1**.

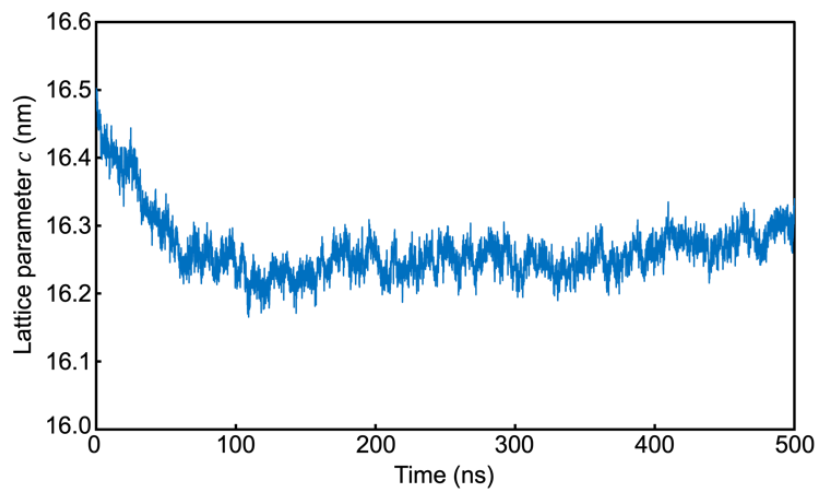

**Fig. S21** Time dependence of lattice parameter  $c$  of MD simulation box for compound **2**.

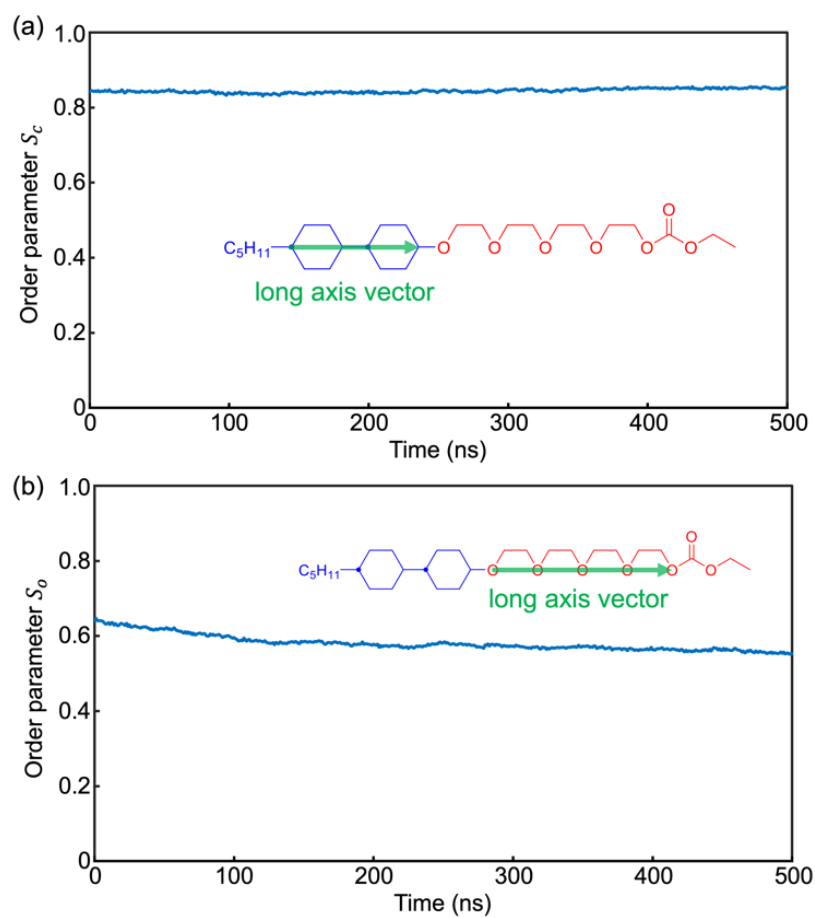

**Fig. S22** Time dependencies of order parameters for compound 1: (a)  $S_c$  and (b)  $S_o$ .

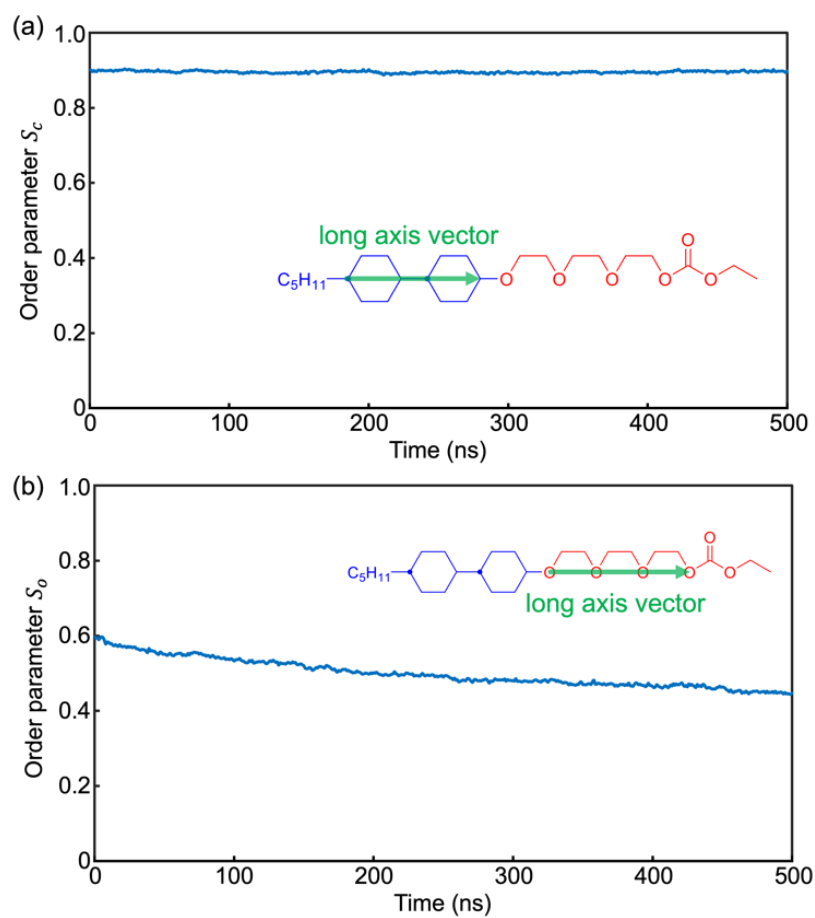

**Fig. S23** Time dependencies of order parameters for compound 2: (a)  $S_c$  and (b)  $S_o$ .
